# Supplementary material for: Improving Interlayer Adhesion of Poly(p-phenylene terephthalamide) (PPTA)/Ultra-high-molecular-weight Polyethylene (UHMWPE) Laminates Prepared by Plasma Treatment and Hot Pressing Technique
Source: MDPI journal article supplement (doi:10.3390/polym13162600), 2021-08-05
Supplement: s1 [file s1]

Supporting information

# Improving Interlayer Adhesion of Poly(p-phenylene terephthalamide)(PPTA)/Ultra-high-molecular-weight Polyethylene (UHMWPE) Laminates Prepared by Plasma Treatment and Hot Pressing Technique

Long Zhu <sup>1</sup>, Dmitriy A. Dikin <sup>1</sup>, Simona Percec <sup>2</sup>, Fei Ren <sup>1,\*</sup>

<sup>1</sup> Department of Mechanical Engineering, Temple University, Philadelphia, PA 19122, USA; long.zhu@temple.edu (L.Z.); ddikin@temple.edu (D.A.D.); renfei@temple.edu (F.R.)

<sup>2</sup> Temple Materials Institute, Temple University, Philadelphia, PA 19122, USA; simona.percec@temple.edu

\* Correspondence: renfei@temple.edu

**Table S1.** Surface free energy of UHMWPE films treated for different times and powers.

| Treatment time (min) | Treatment power (W) | Average contact angle of water (°) | Average contact angle of glycerol (°) | Surface free energy (mJ/m <sup>2</sup> ) |
|----------------------|---------------------|------------------------------------|---------------------------------------|------------------------------------------|
| Untreated            |                     | 95.63                              | 83.93                                 | 21.05                                    |
| 1                    | 6.8                 | 86.39                              | 82.51                                 | 20.89                                    |
| 1                    | 10.5                | 40.40                              | 45.35                                 | 58.72                                    |
| 1                    | 18                  | 37.11                              | 41.90                                 | 60.86                                    |
| 2                    | 18                  | 36.90                              | 35.32                                 | 59.2                                     |
| 5                    | 18                  | 26.10                              | 25.96                                 | 55.19                                    |
